# Supplementary material
Source: PubMed Central journal article supplement (PMC4615315)
Supplement: NIHMS698249-supplement-01.pdf [file NIHMS698249-supplement-01.pdf]

**Supplemental Table 1: Association between *NOD2* variants and Crohn’s disease phenotypes in an electronic health record cohort**

|                  | Fistulizing disease  |                          |                               | Surgery              |                          |                              |
|------------------|----------------------|--------------------------|-------------------------------|----------------------|--------------------------|------------------------------|
|                  | Prospective registry | EHR cohort <sup>  </sup> | Published data <sup>†42</sup> | Prospective registry | EHR cohort <sup>  </sup> | Published data <sup>42</sup> |
| Reference allele | 1 (Reference)        | 1 (Reference)            | 1 (Reference)                 | 1 (Reference)        | 1 (Reference)            | 1 (Reference)                |
| Heterozygous     | 1.07 (0.70 – 1.64)   | 1.08 (0.72 – 1.60)       | 1.08 (0.96 – 1.21)            | 1.11 (0.72 – 1.72)   | 1.30 (0.88 – 1.94)       | 1.48 (1.25 – 1.75)           |
| Homozygous       | 1.69 (1.04 – 2.74)   | 1.72 (1.05 – 2.84)       | 1.41 (1.26 – 1.57)            | 1.64 (0.95 – 2.82)   | 1.67 (1.04 – 2.69)       | 1.49 (1.16 – 1.87)           |

EHR – electronic health record

† - Composite endpoint of complicated Crohn’s disease

|| - Defined as the presence of 1 or more ICD-9 codes for fistulizing disease or 1 or more free text mentions of relevant terms

||| - Defined as the presence of 1 or more ICD-9 codes for CD related surgery or 1 or more free text mention of relevant terms
